# Supplementary material
Source: Springer Nature journal article supplement (https://www.springermedizin.de/resource/supplementary/12885_2011_2797_MOESM5_ESM.pdf/9462008)

# Males

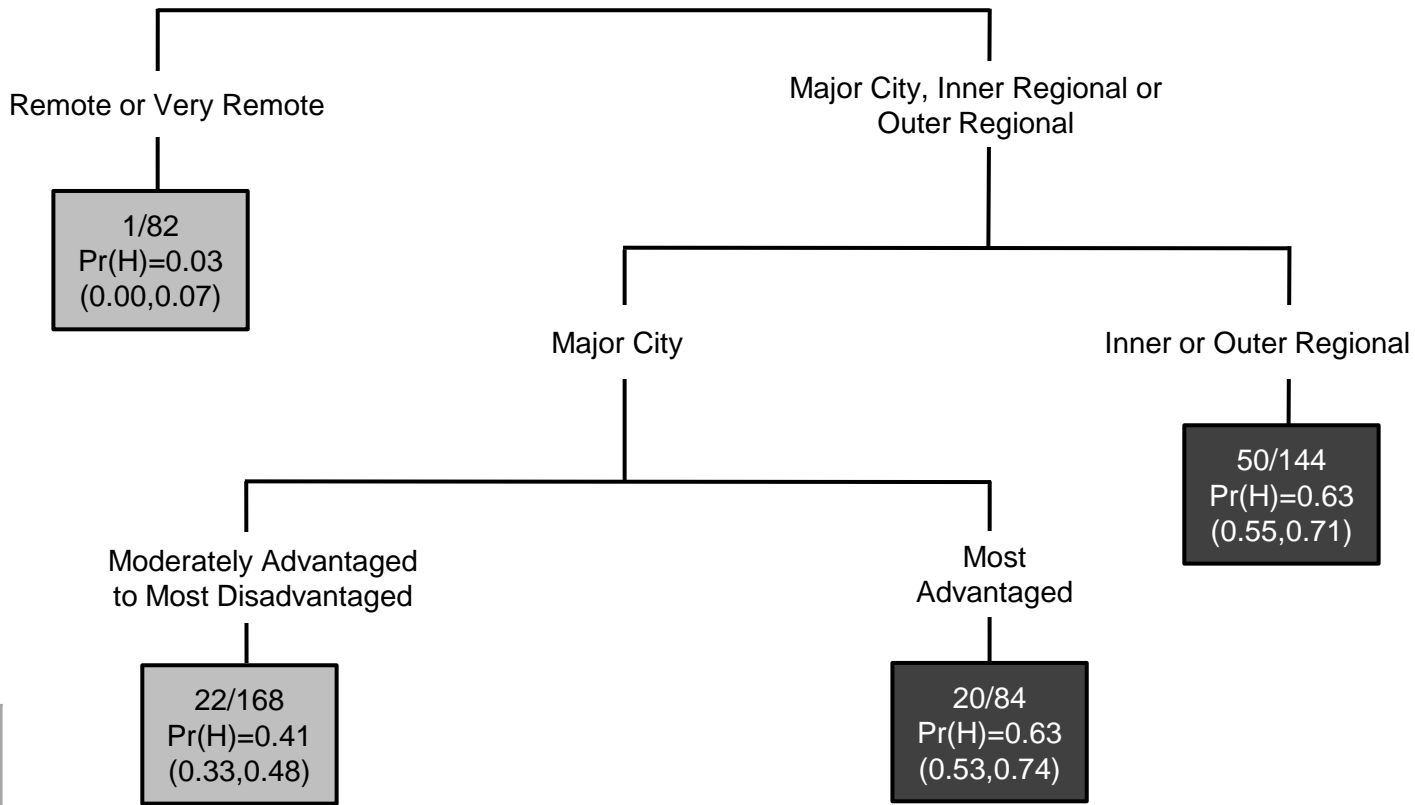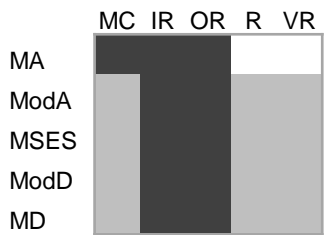

Supplement: MOESM5 [file 9462008]
